# Supplementary material
Source: publisher figshare collection journal article supplement (https://tandf.figshare.com/articles/dataset/_/8020769)
Supplement: Supplementary file 1 [file 1 › Revised Supplementary material.docx]

**Example of square planar Copper(II) biuret complex: Crystal structure, DNA and Protein binding activity and Molecular docking study**

Niladri Biswas1, Ankur Chaudhuri2, Sibani Chakraborty2, Chirantan Roy Choudhury1*

1*Department of Chemistry, West Bengal State University, Barasat, Kolkata-700126, India.*

2*Department of Microbiology, West Bengal State University, Barasat, Kolkata-700126, India.*

* Corresponding author:

Tel: + 91-9836306502

Fax: +91-33-2524-1577

Email: crchoudhury2000@yahoo.com

**Supplementary Table and Figures**

**S1:** Infrared spectrum of the complex **1** in solid KBr matrices at 300K.

**S2:** The electronic absorption spectrum of complex **1** in Tris- HCl buffer medium at 300K. The inset shows d→d transition.

**S3:** The cyclic voltammogram of 1 mM concentration of complex **1** in Tris-HCl buffer medium containing 0.1 M TBAP on SCE as reference at a scan rate of 50 mV sec-1.

**S4:** UV-Vis spectra of complex **1** in DMSO, Tris- HCl buffer and acetonitrile medium.

**T1:** UV-Vis band positions of **1** in DMSO, Tris- HCl buffer and acetonitrile medium.

**S5:** Scatchard plot of log [(I0-I)/I] *vs* log[Q] .

**S6A:** Stern-Volmer non-linear plots of F0/F vs. [Q] of the complex **1** with BSA.

**S6B:** Stern-Volmer non-linear plots of F0/F vs. [Q] of the complex **1** with HSA.

**S7A:**  Scatchard plot of log [(F0-F)/F] *vs* log[Q] of BSA luminescence titrations for the complex **1**.

**S7B:**  Scatchard plot of log [(F0-F)/F] *vs* log[Q] of HSA luminescence titrations for the complex **1**.

**Fig. S1:**  Infrared spectrum of the complex **1** in solid KBr matrices at 300K.

**Fig. S2**: The electronic absorption spectrum of complex **1** in Tris-HCl buffer medium at 300K. The inset shows d→d transition.

**Fig. S3:** The cyclic voltammogram of 1 mM concentration of complex **1** in Tris- HCl buffer medium containing 0.1 M TBAP on SCE as reference at a scan rate of 50 mV sec-1.

**Stability of complex 1 in solution**

All the biological experiments of the titled copper(II) complexwere carried out in Tris-HCl buffer aqueous medium. So it is very important to check up the stability of complex **1** in aqueous buffer which played an important role in its structure-function relation. To ascertain the integrity of the complex **1**, the following experiments were performed. An IR spectrum of the residue of complex **1** obtained after evaporating the aqueous buffer medium was matched with that of a freshly prepared sample of the same. The two spectra matched nicely. Similarly the UV-Vis absorption spectrum of complex **1** in three different solutions (DMSO, Tris-HCl buffer and acetonitrile) was also matched nicely with little shift. Therefore, after analyzing both IR and UV-Vis spectral study, it was concluded that complex **1** is stable in solid phase as well as in solution phase.

**Fig S4:** UV-Vis spectra of complex **1** in DMSO, Tris-HCl buffer and acetonitrile medium.

| **Solvents/**  **medium**  **used** | **DMSO** | **Tris-HCl buffer** | **Acetonitrile** |
| --- | --- | --- | --- |
| **UV-Vis**  **bands** | 678 (d-d) | 661 (d-d) | 645 (d-d) |
| 384 (CT) | 383 (CT) | 383 (CT) |
| 280 (CT) | 270 (CT) | 270 (CT) |

**T1:** UV-Vis band positions of **1** in DMSO, Tris-HCl buffer and acetonitrile medium.

**Fig. S5:** Scatchard plot of log [(I0-I)/I] *vs* log[Q] .

**Fig. S6A:** Stern-Volmer non-linear plots of F0/F vs. [Q] of the complex **1** with BSA.

**Fig. S6B:** Stern-Volmer non-linear plots of F0/F vs. [Q] of the complex **1** with HSA.

**Fig. S7A:** Scatchard plot of log [(F0-F)/F] vs log[Q] of BSA luminescence titrations for the complex **1**.

**Fig. S7B:** Scatchard plot of log [(F0-F)/F] *vs* log[Q] of HSA luminescence titrations for the complex **1**.
